# Supplementary material for: Integrated ATAC-Seq and RNA-Seq Data Analysis to Reveal OsbZIP14 Function in Rice in Response to Heat Stress
Source: MDPI journal article supplement (doi:10.3390/ijms24065619), 2023-03-15
Supplement: s1 [file s1]

Table S1 Data of tested rice under high temperature stress downloaded from this study

| NCBI login number | Rice varieties tested                                       | Sample | Sequencing type |
|-------------------|-------------------------------------------------------------|--------|-----------------|
| PRJNA604026       | Japonica rice ( <i>Oryza sativa</i> L.) cultivar Nipponbare | leaf   | RNA-seq         |
| PRJNA604028       | Japonica rice ( <i>Oryza sativa</i> L.) cultivar Nipponbare | leaf   | ATAC-seq        |

Table S2 Rice genes with heat stress motifs mapped against known Arabidopsis Transcription factors

| Subject name | Query name   | Identity(%) | E-value  | Score |
|--------------|--------------|-------------|----------|-------|
| AT3G02990.1  | Os03g0161900 | 95.122      | 2.10E-09 | 65.8  |
| AT1G22640.1  | Os02g0642050 | 90.909      | 6.24E-08 | 60.2  |
| AT1G22640.1  | Os02g0641900 | 88          | 6.24E-08 | 60.2  |
| AT5G16820.1  | Os03g0795900 | 76.423      | 2.61E-28 | 128   |
| AT5G16820.1  | Os07g0178600 | 76.695      | 9.38E-28 | 126   |
| AT5G16820.1  | Os01g0749300 | 76.151      | 5.65E-25 | 117   |
| AT5G16820.1  | Os10g0419300 | 75          | 2.03E-24 | 115   |
| AT5G16820.1  | Os07g0640900 | 79.286      | 3.42E-17 | 91.6  |
| AT5G16820.1  | Os03g0366800 | 81.25       | 1.23E-16 | 89.8  |
| AT5G16820.1  | Os02g0527300 | 82          | 5.73E-15 | 84.2  |
| AT5G16820.1  | Os09g0526650 | 82.716      | 4.46E-11 | 71.3  |
| AT5G16820.1  | Os09g0526600 | 79.245      | 4.46E-11 | 71.3  |
| AT5G16820.1  | Os08g0546800 | 93.333      | 5.77E-10 | 67.6  |
| AT5G16820.1  | Os06g0553100 | 87.755      | 3.47E-07 | 58.4  |
| AT2G18160.1  | Os02g0132500 | 80.435      | 2.86E-11 | 71.3  |
| AT3G06490.1  | Os11g0684000 | 79.592      | 1.18E-31 | 139   |
| AT3G06490.1  | Os01g0128000 | 73.913      | 4.30E-21 | 104   |
| AT3G06490.1  | Os12g0564100 | 83.019      | 7.20E-19 | 97.1  |
| AT3G06490.1  | Os04g0508500 | 95.349      | 1.57E-10 | 69.4  |
| AT3G06490.1  | Os03g0142600 | 95.349      | 1.57E-10 | 69.4  |

|             |              |        |          |      |
|-------------|--------------|--------|----------|------|
| AT3G06490.1 | Os02g0618400 | 79.208 | 1.57E-10 | 69.4 |
| AT3G06490.1 | Os09g0538400 | 95     | 7.30E-09 | 63.9 |
| AT3G06490.1 | Os02g0618525 | 100    | 7.30E-09 | 63.9 |
| AT3G06490.1 | Os01g0637800 | 77.778 | 9.45E-08 | 60.2 |
| AT3G06490.1 | Os12g0175400 | 94.595 | 3.40E-07 | 58.4 |
| AT3G06490.1 | Os11g0181000 | 90.698 | 3.40E-07 | 58.4 |
| AT3G06490.1 | Os11g0180900 | 94.595 | 3.40E-07 | 58.4 |
| AT3G06490.1 | Os08g0549000 | 94.595 | 3.40E-07 | 58.4 |
| AT3G06490.1 | Os05g0429900 | 94.595 | 3.40E-07 | 58.4 |
| AT3G06490.1 | Os03g0578900 | 94.595 | 3.40E-07 | 58.4 |
| AT3G06490.1 | Os03g0303500 | 94.595 | 3.40E-07 | 58.4 |
| AT3G06490.1 | Os01g0874300 | 94.595 | 3.40E-07 | 58.4 |
| AT3G06490.1 | Os01g0169000 | 94.595 | 3.40E-07 | 58.4 |
| AT3G59350.1 | Os01g0323100 | 78.74  | 1.67E-65 | 252  |
| AT1G79180.1 | Os02g0624350 | 94.737 | 6.89E-08 | 60.2 |
| AT1G79180.1 | Os02g0624300 | 85.714 | 6.89E-08 | 60.2 |
| AT5G66730.1 | Os02g0518500 | 73.597 | 7.76E-45 | 183  |

---

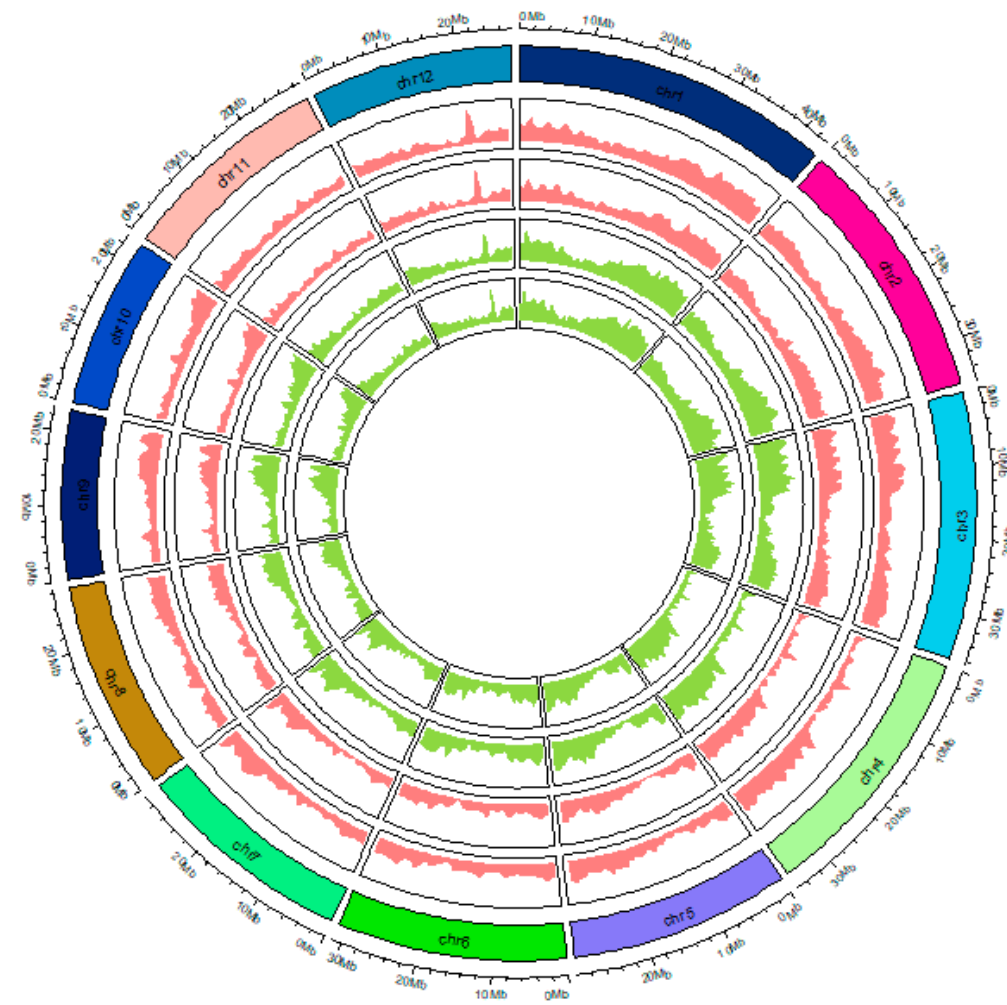

Figure S1. Circos plots of ATAC-seq sequencing fragments of all chromosomes in rice

(red and green peaks represent two biological replicate sequenced fragments from the 36h blank and experimental groups, respectively, and the outermost regions of different colors represent different chromosomes of rice.)

Table S3 Differential THSs identified after heat treatment

| positively enriched THSs | negatively enriched THSs | Percentage of diffential THSs |
|--------------------------|--------------------------|-------------------------------|
| 1692                     | 156                      | 7.07%                         |

A

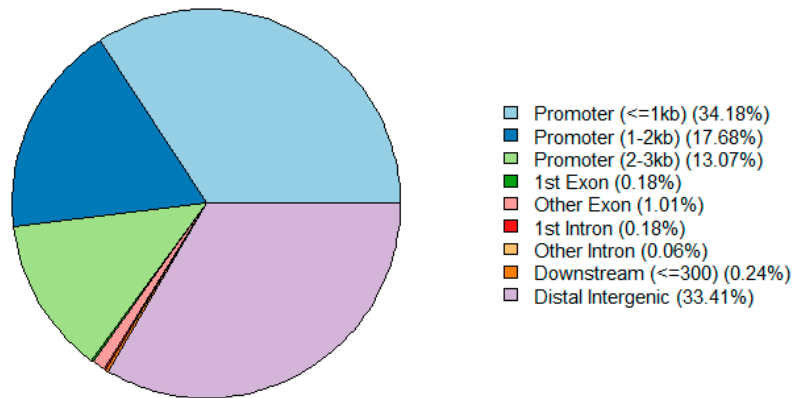

B

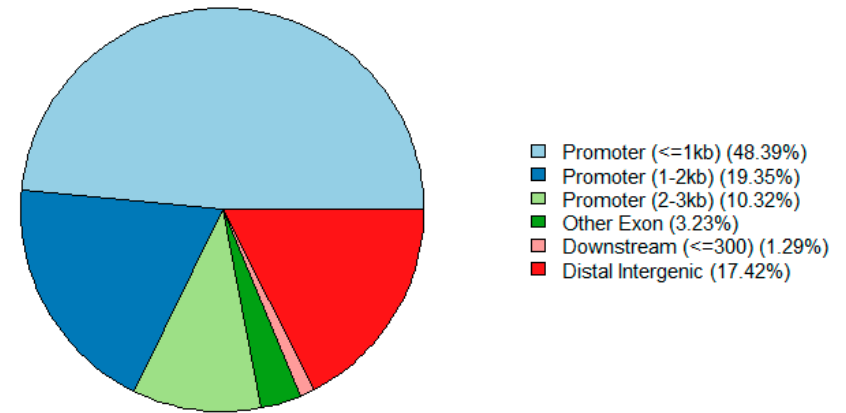

Figure S2. Quantity and Genome Distribution of Differentially Enriched THS after Heat Treatment

(A is the proportion of differentially enriched THSs, B is the positive distribution of THSs in the genome after high temperature treatment, and c is the negative distribution of the THSs after high temperature treatment.)

Total Target Sequences = 1692, Total Background Sequences = 43169

| Rank | Motif                                                                               | Name                                                   | P-value | log P-value | q-value (Benjamini) | # Target Sequences with Motif | % of Targets Sequences with Motif | # Background Sequences with Motif | % of Background Sequences with Motif |
|------|-------------------------------------------------------------------------------------|--------------------------------------------------------|---------|-------------|---------------------|-------------------------------|-----------------------------------|-----------------------------------|--------------------------------------|
| 1    |    | IBL1(bHLH)/Seedling-IBL1-ChIP-Seq(GSE51120)/Homer      | 1e-60   | -1.395e+02  | 0.0000              | 936.0                         | 55.32%                            | 15368.3                           | 35.60%                               |
| 2    |    | CAMTA1(CAMTA)/col-CAMTA1-DAP-Seq(GSE60143)/Homer       | 1e-54   | -1.251e+02  | 0.0000              | 549.0                         | 32.45%                            | 7286.6                            | 16.88%                               |
| 3    |    | c-Myc(bHLH)/LNCAP-cMyc-ChIP-Seq(Unpublished)/Homer     | 1e-47   | -1.091e+02  | 0.0000              | 430.0                         | 25.41%                            | 5348.5                            | 12.39%                               |
| 4    |    | SPCH(bHLH)/Seedling-SPCH-ChIP-Seq(GSE57497)/Homer      | 1e-40   | -9.273e+01  | 0.0000              | 507.0                         | 29.96%                            | 7245.8                            | 16.79%                               |
| 5    |    | HIF-1b(HLH)/T47D-HIF1b-ChIP-Seq(GSE59937)/Homer        | 1e-39   | -9.084e+01  | 0.0000              | 720.0                         | 42.55%                            | 11887.1                           | 27.54%                               |
| 6    |    | ABF1(bZIP)/Arabidopsis-ABF1-ChIP-Seq(GSE80564)/Homer   | 1e-37   | -8.597e+01  | 0.0000              | 464.0                         | 27.42%                            | 6558.9                            | 15.19%                               |
| 7    |    | CAMTA5(CAMTA)/col-CAMTA5-DAP-Seq(GSE60143)/Homer       | 1e-32   | -7.382e+01  | 0.0000              | 264.0                         | 15.60%                            | 3066.7                            | 7.10%                                |
| 8    |    | bHLHE41(bHLH)/proB-Bhlhe41-ChIP-Seq(GSE93764)/Homer    | 1e-31   | -7.339e+01  | 0.0000              | 583.0                         | 34.46%                            | 9439.5                            | 21.87%                               |
| 9    |    | BMAL1(bHLH)/Liver-Bmal1-ChIP-Seq(GSE39860)/Homer       | 1e-28   | -6.494e+01  | 0.0000              | 576.0                         | 34.04%                            | 9587.1                            | 22.21%                               |
| 10   |    | SPL9(SBP)/colamp-SPL9-DAP-Seq(GSE60143)/Homer          | 1e-27   | -6.436e+01  | 0.0000              | 741.0                         | 43.79%                            | 13369.5                           | 30.97%                               |
| 11   |    | ATAF1(NAC)/col-ATAF1-DAP-Seq(GSE60143)/Homer           | 1e-27   | -6.356e+01  | 0.0000              | 1040.0                        | 61.47%                            | 20779.2                           | 48.14%                               |
| 12   |    | NPAS2(bHLH)/Liver-NPAS2-ChIP-Seq(GSE39860)/Homer       | 1e-27   | -6.230e+01  | 0.0000              | 366.0                         | 21.63%                            | 5257.4                            | 12.18%                               |
| 13   |    | HSF6(HSF)/col-HSF6-DAP-Seq(GSE60143)/Homer             | 1e-26   | -6.196e+01  | 0.0000              | 64.0                          | 3.78%                             | 288.9                             | 0.67%                                |
| 14   |    | CLOCK(bHLH)/Liver-Clock-ChIP-Seq(GSE39860)/Homer       | 1e-25   | -5.924e+01  | 0.0000              | 267.0                         | 15.78%                            | 3435.8                            | 7.96%                                |
| 15   |    | bHLHE40(bHLH)/HepG2-BHLHE40-ChIP-Seq(GSE31477)/Homer   | 1e-25   | -5.897e+01  | 0.0000              | 183.0                         | 10.82%                            | 1964.8                            | 4.55%                                |
| 16   |    | n-Myc(bHLH)/mES-nMyc-ChIP-Seq(GSE11431)/Homer          | 1e-24   | -5.590e+01  | 0.0000              | 325.0                         | 19.21%                            | 4630.9                            | 10.73%                               |
| 17   |   | E-box/Arabidopsis-Promoters/Homer                      | 1e-23   | -5.506e+01  | 0.0000              | 314.0                         | 18.56%                            | 4438.7                            | 10.28%                               |
| 18   |  | SPL1(SBP)/colamp-SPL1-DAP-Seq(GSE60143)/Homer          | 1e-23   | -5.503e+01  | 0.0000              | 645.0                         | 38.12%                            | 11540.7                           | 26.74%                               |
| 19   |  | PIF4(bHLH)/Seedling-PIF4-ChIP-Seq(GSE35315)/Homer      | 1e-23   | -5.415e+01  | 0.0000              | 396.0                         | 23.40%                            | 6118.0                            | 14.17%                               |
| 20   |  | SPL15(SBP)/colamp-SPL15-DAP-Seq(GSE60143)/Homer        | 1e-23   | -5.358e+01  | 0.0000              | 563.0                         | 33.27%                            | 9742.0                            | 22.57%                               |
| 21   |  | AT2G01818(PLATZ)/col-AT2G01818-DAP-Seq(GSE60143)/Homer | 1e-23   | -5.300e+01  | 0.0000              | 53.0                          | 3.13%                             | 231.5                             | 0.54%                                |

Figure S3. Positive enriched motif identified by ATAC-seq (partial)

| Rank | Motif                                                                               | Name                                                           | P-value | log P-value | q-value (Benjamini) | # Target Sequences with Motif | % of Targets Sequences with Motif | # Background Sequences with Motif | % of Background Sequences with Motif |
|------|-------------------------------------------------------------------------------------|----------------------------------------------------------------|---------|-------------|---------------------|-------------------------------|-----------------------------------|-----------------------------------|--------------------------------------|
| 1    |    | bHLH130(bHLH)/col-bHLH130-DAP-Seq(GSE60143)/Homer              | 1e-5    | -1.162e+01  | 0.0091              | 28.0                          | 17.95%                            | 3580.0                            | 7.31%                                |
| 2    |    | bHLH122(bHLH)/col100-bHLH122-DAP-Seq(GSE60143)/Homer           | 1e-3    | -8.227e+00  | 0.1344              | 27.0                          | 17.31%                            | 4124.1                            | 8.42%                                |
| 3    |    | bHLH80(bHLH)/col-bHLH80-DAP-Seq(GSE60143)/Homer                | 1e-3    | -7.314e+00  | 0.2235              | 27.0                          | 17.31%                            | 4374.4                            | 8.93%                                |
| 4    |    | TCP3(TCP)/colamp-TCP3-DAP-Seq(GSE60143)/Homer                  | 1e-3    | -7.123e+00  | 0.2235              | 11.0                          | 7.05%                             | 1090.8                            | 2.23%                                |
| 5    |    | Unknown4/Arabidopsis-Promoters/Homer                           | 1e-2    | -6.630e+00  | 0.2657              | 36.0                          | 23.08%                            | 6796.6                            | 13.88%                               |
| 6    |    | AT4G00250(GeBP)/col-AT4G00250-DAP-Seq(GSE60143)/Homer          | 1e-2    | -6.459e+00  | 0.2657              | 24.0                          | 15.38%                            | 3927.5                            | 8.02%                                |
| 7    |    | AT5G56840(MYBrelated)/colamp-AT5G56840-DAP-Seq(GSE60143)/Homer | 1e-2    | -6.002e+00  | 0.3555              | 39.0                          | 25.00%                            | 7827.1                            | 15.98%                               |
| 8    |    | At5g47390(MYBrelated)/col-At5g47390-DAP-Seq(GSE60143)/Homer    | 1e-2    | -5.908e+00  | 0.3555              | 39.0                          | 25.00%                            | 7869.0                            | 16.07%                               |
| 9    |    | At1g14580(C2H2)/colamp-At1g14580-DAP-Seq(GSE60143)/Homer       | 1e-2    | -5.527e+00  | 0.4448              | 9.0                           | 5.77%                             | 964.2                             | 1.97%                                |
| 10   |    | AT5G61620(MYBrelated)/colamp-AT5G61620-DAP-Seq(GSE60143)/Homer | 1e-2    | -5.482e+00  | 0.4448              | 42.0                          | 26.92%                            | 8865.4                            | 18.10%                               |
| 11   |    | At1g49010(MYBrelated)/col-At1g49010-DAP-Seq(GSE60143)/Homer    | 1e-2    | -5.424e+00  | 0.4448              | 49.0                          | 31.41%                            | 10813.3                           | 22.08%                               |
| 12   |    | bZIP18(bZIP)/colamp-bZIP18-DAP-Seq(GSE60143)/Homer             | 1e-2    | -5.173e+00  | 0.4753              | 82.0                          | 52.56%                            | 20652.2                           | 42.17%                               |
| 13   |    | HAT5(Homeobox)/colamp-HAT5-DAP-Seq(GSE60143)/Homer             | 1e-2    | -4.927e+00  | 0.5608              | 9.0                           | 5.77%                             | 1060.2                            | 2.16%                                |
| 14   |    | At4g01280(MYBrelated)/colamp-At4g01280-DAP-Seq(GSE60143)/Homer | 1e-2    | -4.834e+00  | 0.5717              | 20.0                          | 12.82%                            | 3494.2                            | 7.13%                                |
| 15   |    | ANAC042(NAC)/col-ANAC042-DAP-Seq(GSE60143)/Homer               | 1e-2    | -4.802e+00  | 0.5717              | 24.0                          | 15.38%                            | 4481.2                            | 9.15%                                |
| 16   |    | At5g58900(MYBrelated)/colamp-At5g58900-DAP-Seq(GSE60143)/Homer | 1e-2    | -4.781e+00  | 0.5717              | 42.0                          | 26.92%                            | 9222.8                            | 18.83%                               |
| 17   |   | At5g08520(MYBrelated)/colamp-At5g08520-DAP-Seq(GSE60143)/Homer | 1e-2    | -4.751e+00  | 0.5717              | 30.0                          | 19.23%                            | 6027.9                            | 12.31%                               |
| 18   |  | AZF1(C2H2)/colamp-AZF1-DAP-Seq(GSE60143)/Homer                 | 1e-2    | -4.716e+00  | 0.5717              | 85.0                          | 54.49%                            | 21897.3                           | 44.71%                               |
| 19   |  | At1g19000(MYBrelated)/colamp-At1g19000-DAP-Seq(GSE60143)/Homer | 1e-2    | -4.633e+00  | 0.5717              | 29.0                          | 18.59%                            | 5820.0                            | 11.88%                               |

Figure S4. The negatively enriched motif identified by ATAC-seq

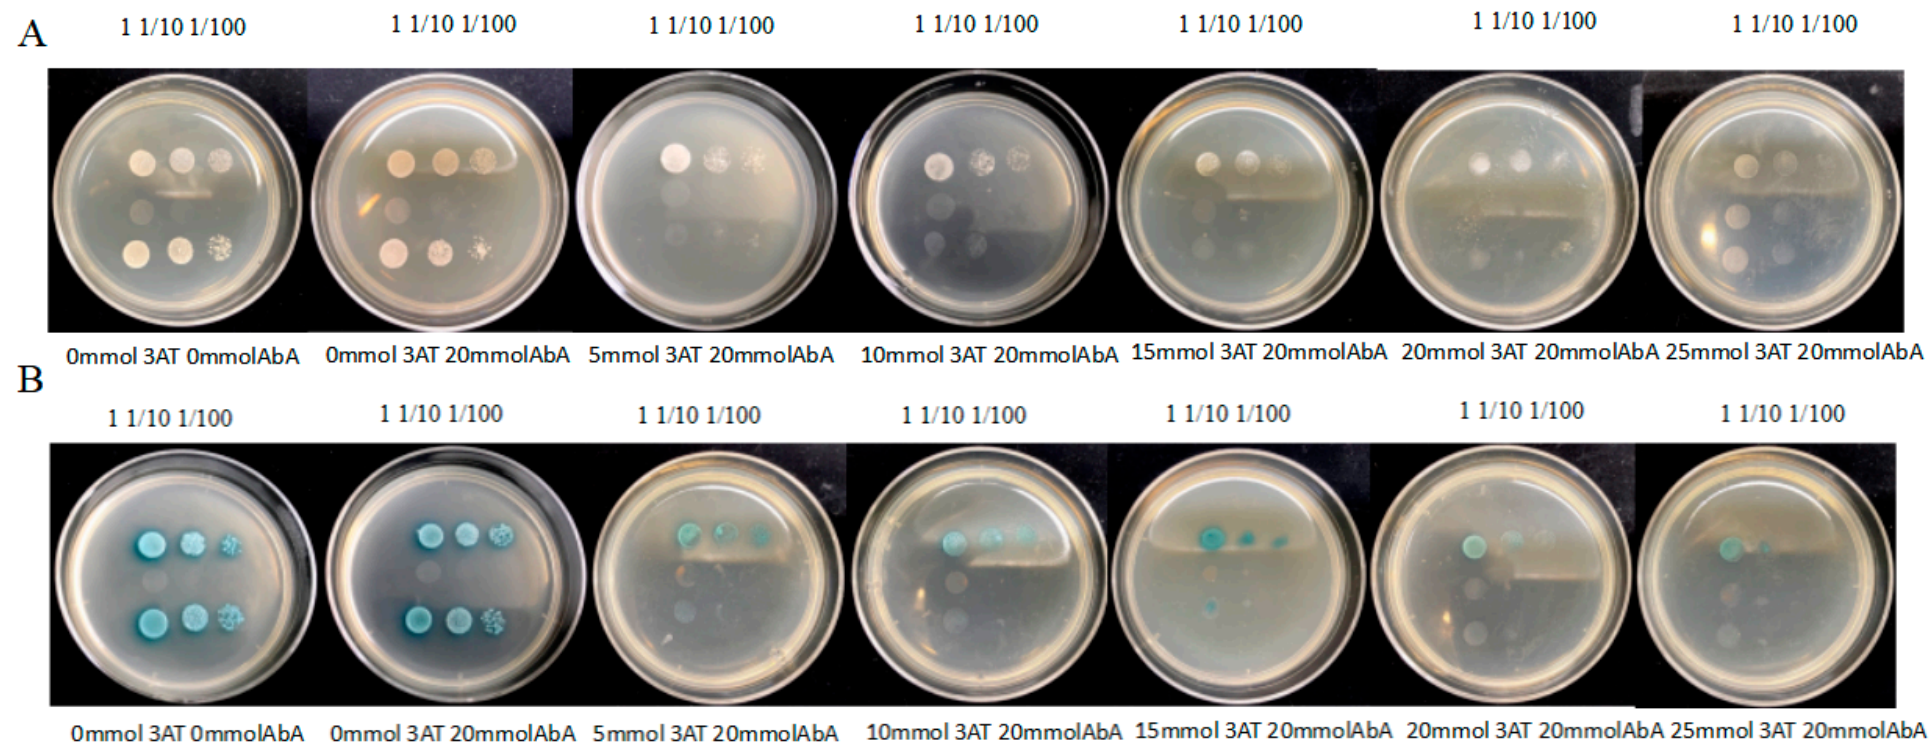

Figure S5. *OsZIP14* Self activation Activity Inhibition in Three and Four Deficiency Plates



A

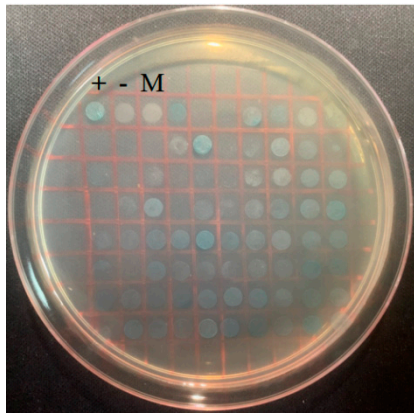

B

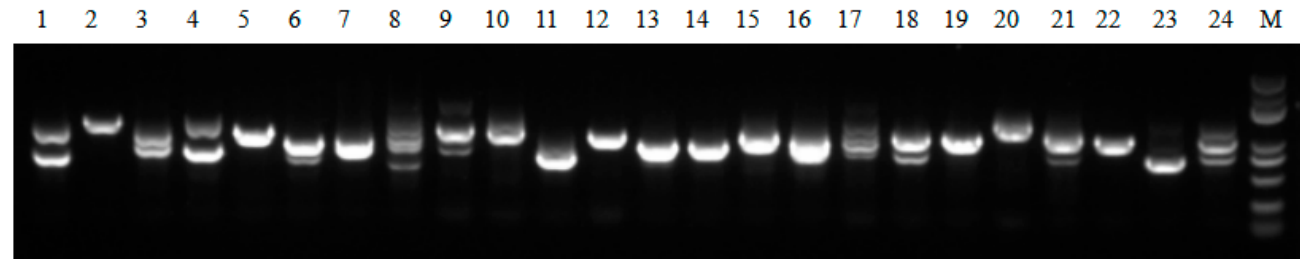

C

|   | NCBI accession | Gene annotation                          | Sequence similarity | E-value |
|---|----------------|------------------------------------------|---------------------|---------|
| 1 | XM_026021003.1 | CCR4-NOT transcription complex subunit 1 | 97.56%              | 0       |
| 2 | XM_015780209.2 | photosystem I assembly protein           | 99.43%              | 0       |
| 3 | AK072521.1     | cDNA clone:J023131B06                    | 98.49%              | 0       |
| 4 | XM_015785159.2 | uncharacterized                          | 98.70%              | 0       |
| 5 | KC140124.1     | NLS receptor mRNA                        | 97.94%              | 0       |
| 6 | XM_015787757.2 | uncharacterized                          | 99.42%              | 0       |
| 7 | XM_015789930.2 | bZIP transcription factor                | 100.00%             | 0       |
| 8 | XM_015789238.2 | protein PELPK1                           | 99.81%              | 0       |

Figure S6. Library screening of *OsZIP14* interaction protein. A is the yeast monoclonal grown on the solid medium containing 20mmol AbA and 3-AT containing X- $\alpha$ -Gal, + is the positive control, and - is the negative control; B is the PCR detection result of inserted fragments in partial cDNA library, and M is Marker=5000bp. Some Potential Interacting Proteins of *OsZIP14* in C.



```

OsbZIP14 -----ATGGCATC 8
Ko      GTAGCAATCTAGTGTGCTTGTGTTCTTCTCTCCGAAATCTTTGGATGATTGATTGATGGCATC 350

OsbZIP14 GTCAAGCGGGAGCGGGGGAGCGCGGTGTCGGCGGCACGGCGGCGGGGGGGTCTGTCGGCGGCG 78
Ko      GTCAAGCGGGAGCGGGGGAGCGCGGTGTCGGCGGCACGGCGGCGGGGGGGTCTGTCGGCGGCG 420

OsbZIP14 GAGGAGGAGCTGAGGGCGGTTATGGAGCAGCGCGGGCGAAGAGGATGCTGTCGAACAGGGAGTCGGCG 147
Ko      GAGGAGGAGCTGAGGGCGGTTATGGAGCAGCGCGGGCGAAGAGGATGCTGTCGAACAGGGAGTCGGCG 490

OsbZIP14 CGGCGGTTCGGGATGCGGAAGCAGCGCCACCTCGACGACCTCACCGCGCAGGTGGCGCACCTCCGCGCG 217
Ko      CGGCGGTTCGGGATGCGGAAGCAGCGCCACCTCGACGACCTCACCGCGCAGGTGGCGCACCTCCGCGCG 560

OsbZIP14 AGAAGCGGCACGTGCGCACCGCGCTCGGGCTCACCACCCAGGGCTCTCTGGCGTGCACGCGGAGAACGC 287
Ko      AGAAGCGGCACGTGCGCACCGCGCTCGGGCTCACCACCCAGGGCTCTCTGGCGTGCACGCGGAGAACGC 630

OsbZIP14 CGTCCTCCGCACCCAGGCGCGCGAGCTCGCGCGCGCGCTCGGCTCCCTCAACGACATCCTCTCTGCAATC 357
Ko      CGTCCTCCGCACCCAGGCGCGCGAGCTCGCGCGCGCGCTCGGCTCCCTCAACGACATCCTCTCTGCAATC 700

OsbZIP14 AACACCAACGGCGCGCGCGCGCGCGCGCGCGCGCTCACCGTCGCGCGCGCACCGACCGCTCCTCG 427
Ko      AACACCAACGGCGCGCGCGCGCGCGCGCGCGCGCGCTCACCGTCGCGCGCGCACCGACCGCTCCTCG 770

OsbZIP14 CCTTCGACTCCGCGCCTTCGACGACCTCTTCAGATCCTCCCCGAGCTGTTCAGCTTTGCTAG----- 492
Ko      CCTTCGACTCCGCGCCTTCGACGACCTCTTCAGATCCTCCCCGAGCTGTTCAGCTTTGCTAGCTCAA 840

```

Figure S7. *OsbZIP14* Transgenic knockout type
